# Supplementary material for: Controlling amorphous silicon in scratching for fabricating high-performance micromixers
Source: Royal Society of Chemistry journal article supplement (doi:10.1039/d3lc00320e), 2023-01-01
Supplement: d3lc00320e1.pdf [file d3lc00320e1.pdf]

## **Supplementary Information**

### **Controlling amorphous silicon in scratching for fabricating high-performance micromixers**

Tingting Chen<sup>1</sup>, Licong Cui<sup>1</sup>, Wang He<sup>1</sup>, Renxing Liu<sup>1</sup>, Chengqiang Feng<sup>1</sup>, Lei Wu<sup>1</sup>,  
Yang Wang<sup>2</sup>, Huiyun Liu<sup>3</sup>, Linmao Qian<sup>1</sup>, Bingjun Yu<sup>1,\*</sup>

<sup>1</sup> Tribology Research Institute, School of Mechanical Engineering, Southwest  
Jiaotong University, Chengdu 610031, China

<sup>2</sup> Academy of Frontier Sciences, Southwest Jiaotong University, Chengdu 610031,  
China

<sup>3</sup> Department of Electronic & Electrical Engineering, University College London,  
Torrington Place, London WC1E 7JE, U.K.

\* Email: bingjun@swjtu.edu.cn, Tel.: +86 28 87634181, Fax: +86 28 87603924

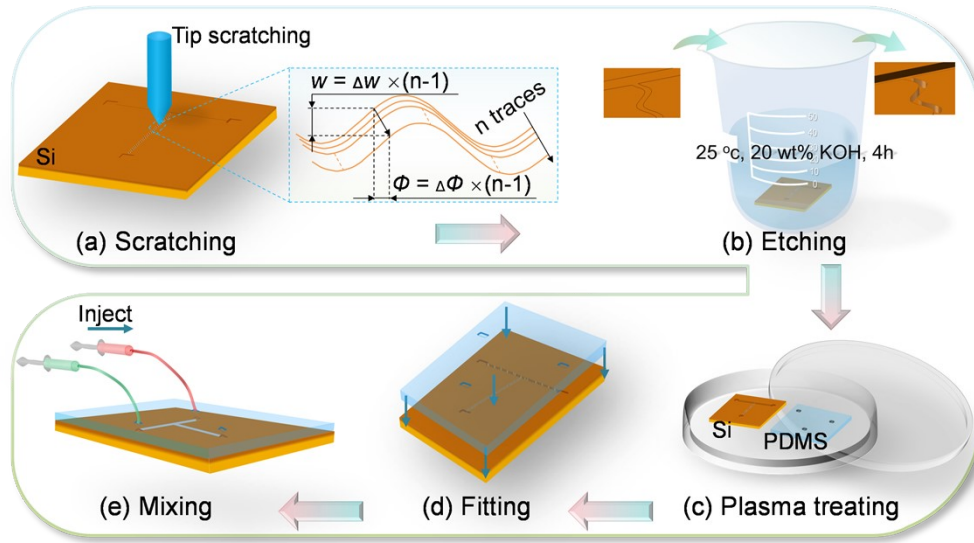

Fig. S1 Schematic diagram of micromixer fabrication. The  $n$  means the number of traces, and the increase for adjacent trace is  $\Delta w = 2\mu\text{m}$  and  $\Delta\phi = 0.8\mu\text{m}$  in here, respectively.

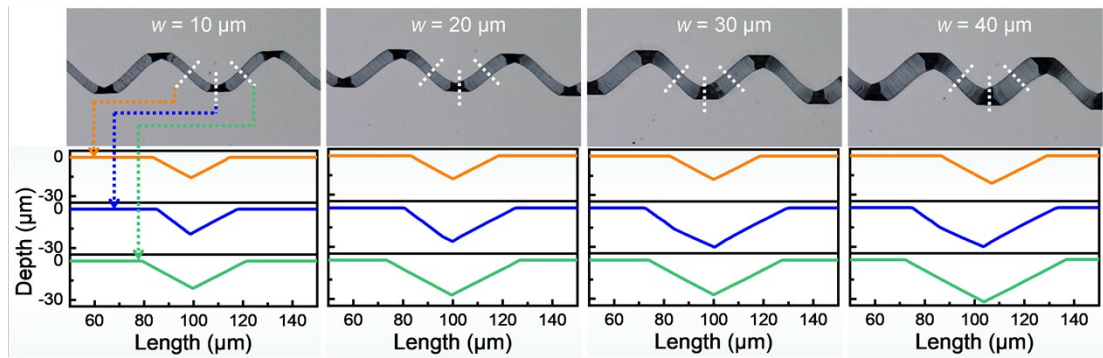

Fig. S2 Microscope images and the profiles of the fabricated channels with different widths, where the measurement of the profiles was schematically indicated on the left.

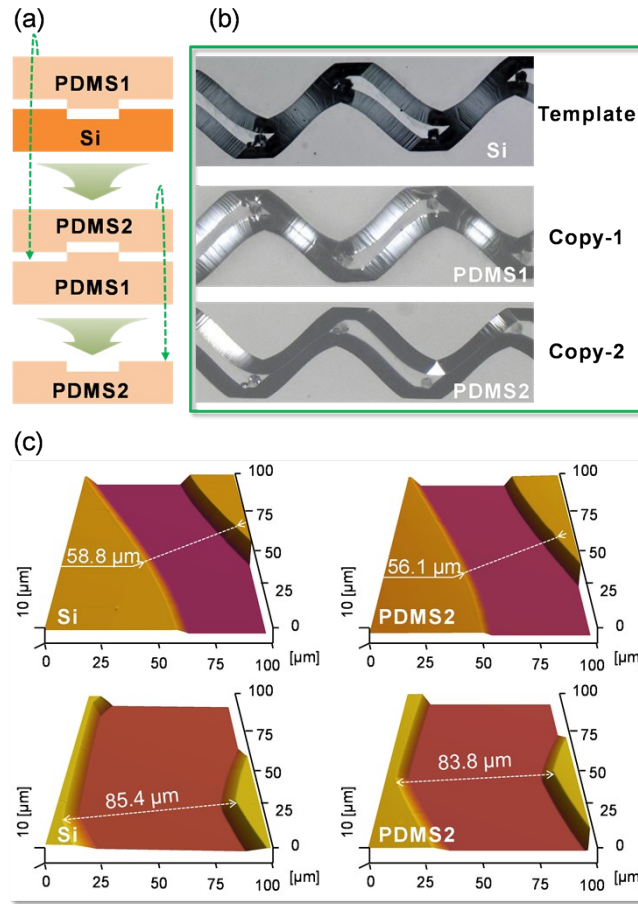

Fig. S3 Replicating of misaligned sine channels. (a) Replicating processes. (b) Microscope images of the misaligned sine channel from Si substrates (Template) to PDMS1 substrates (Copy-1), and then to PDMS2 substrates (Copy-2). (c) AFM images for comparing the misaligned sine channel in Si surface and PDMS2 surface.
